# Supplementary material for: Bioanalytical HPLC method with fluorescence detector for determination of Entresto™ when co-administered with ibuprofen and fexofenadine: a pharmacokinetic study
Source: Royal Society of Chemistry journal article supplement (doi:10.1039/d4ra02163k), 2024-01-01
Supplement: d4ra02163k1.pdf [file d4ra02163k1.pdf]

a)

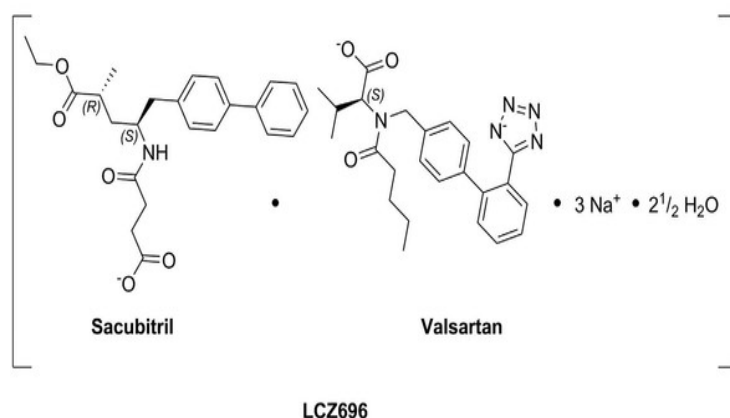

b)

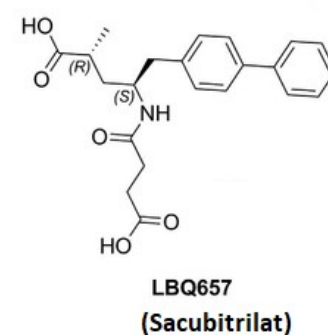

c)

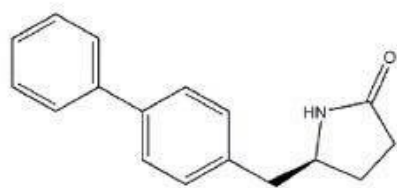

d)

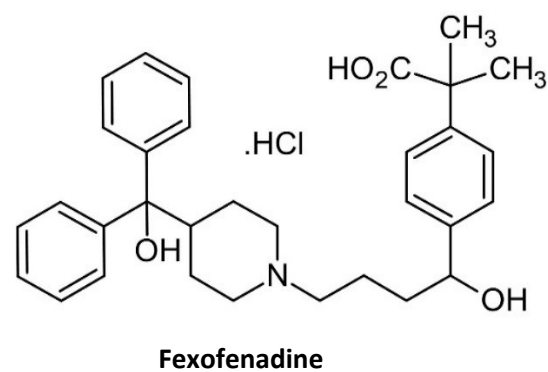

e)

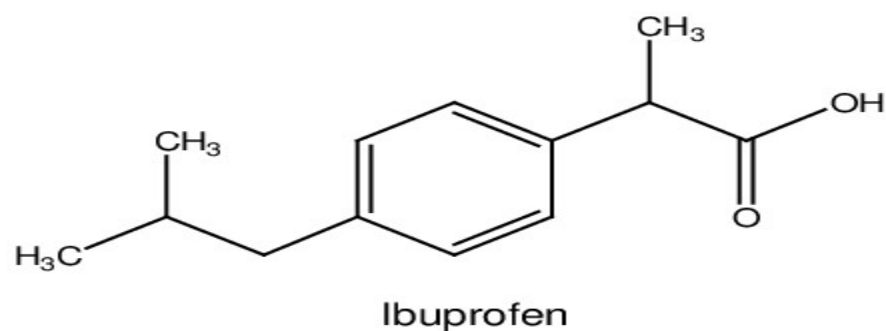

Figure S1: Structures of (a) LCZ696 supramolecular complex, (b) Sacubitrilat ,LBQ657, (c) Internal standard (IS) (d) Fexofenadine and (e) Ibuprofen.

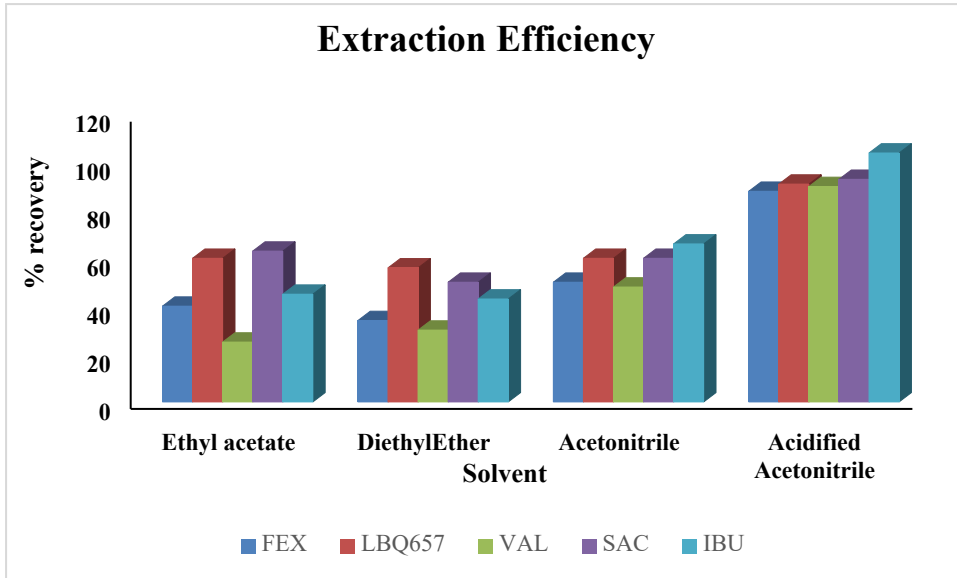

**Figure S2: Effect of different solvents on extraction efficiency of FEX, LBQ657, VAL, SAC and IBU from plasma.**

a)

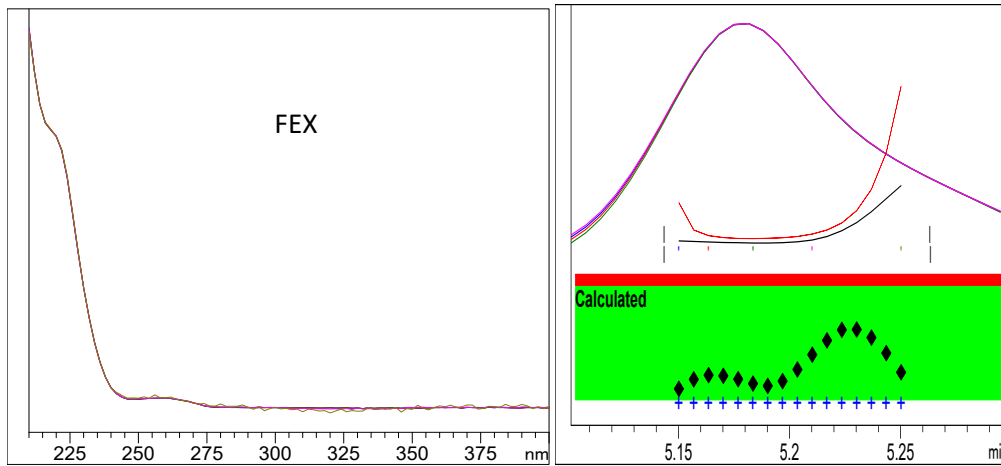

b)

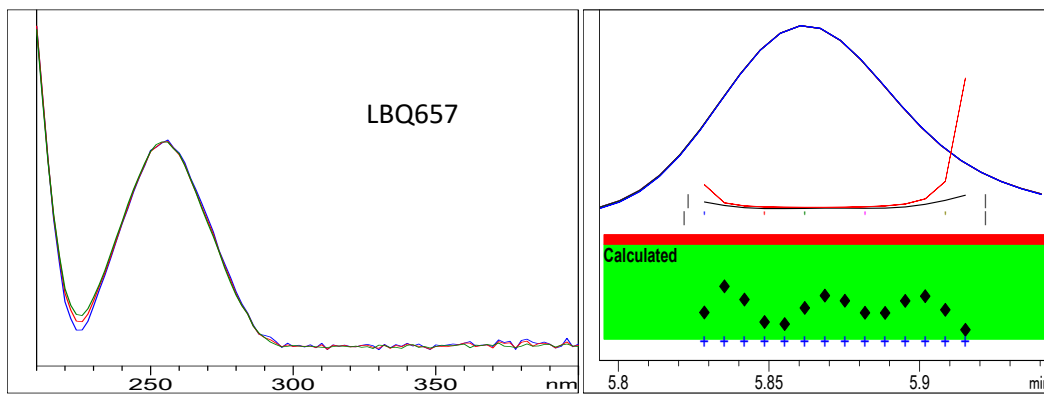

c)

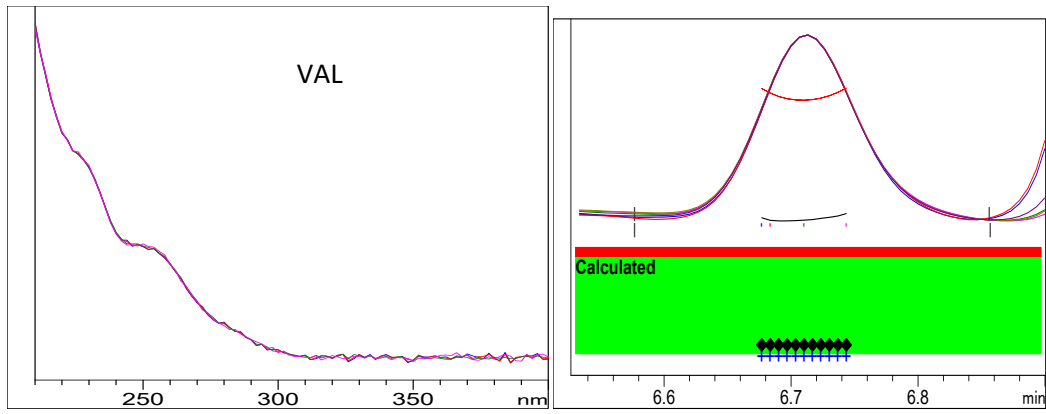

d)

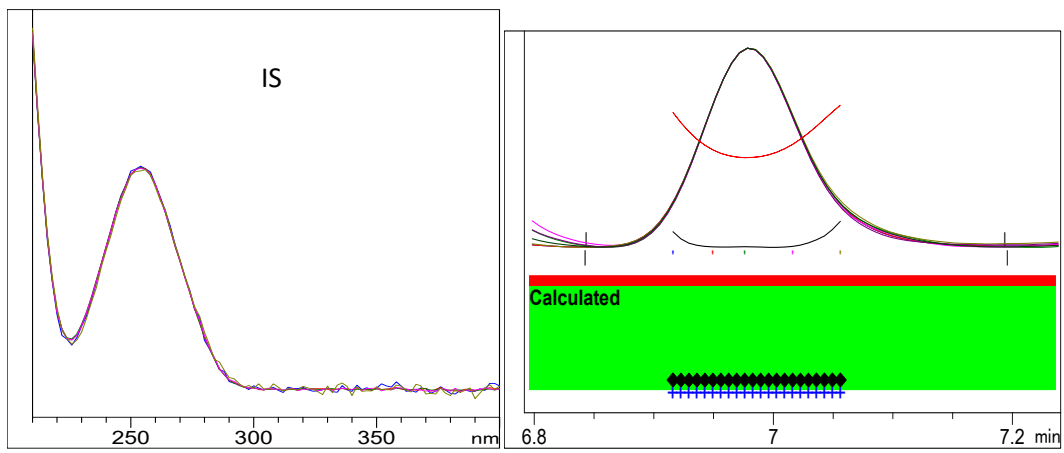

e)

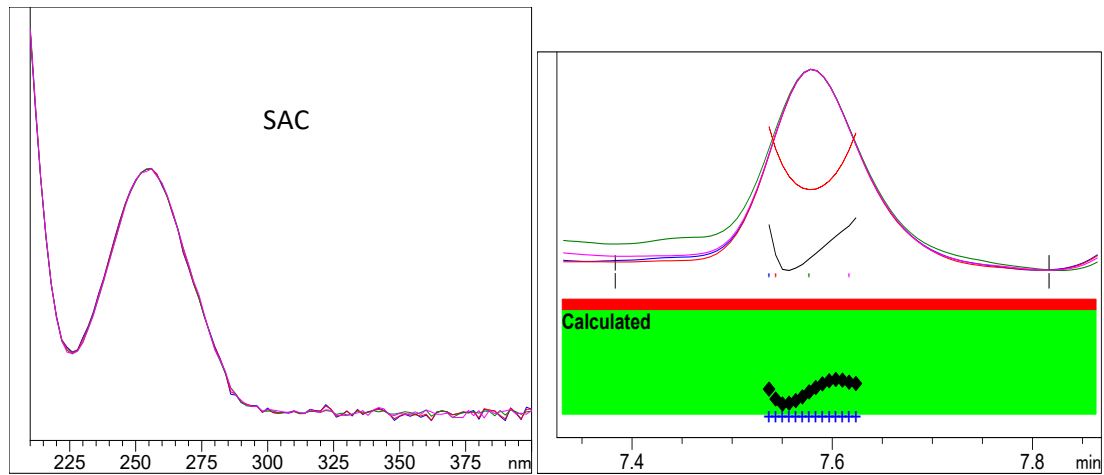

f)

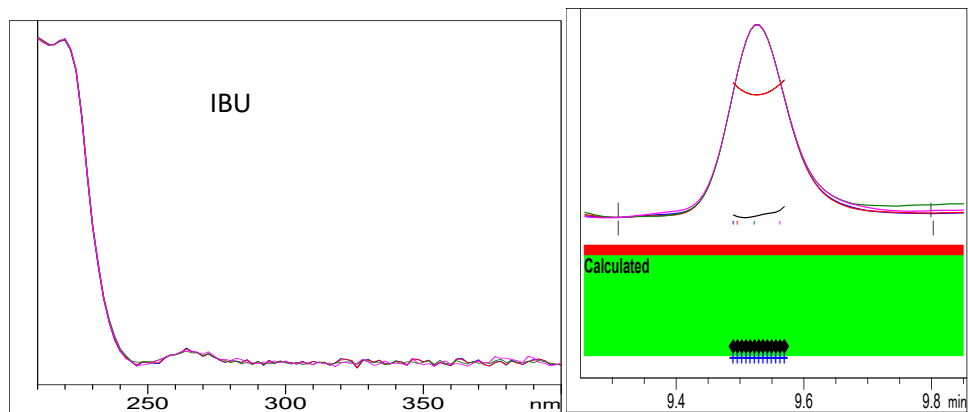

**Figure S3: Superimposed absorption spectra and purity profile illustrating peak purity of (a)FEX, (b) LBQ657, (c) VAL, (d) IS, (e) SAC and (f) IBU obtained from spiked plasma with drugs and IS extracted from DAD.**

a)

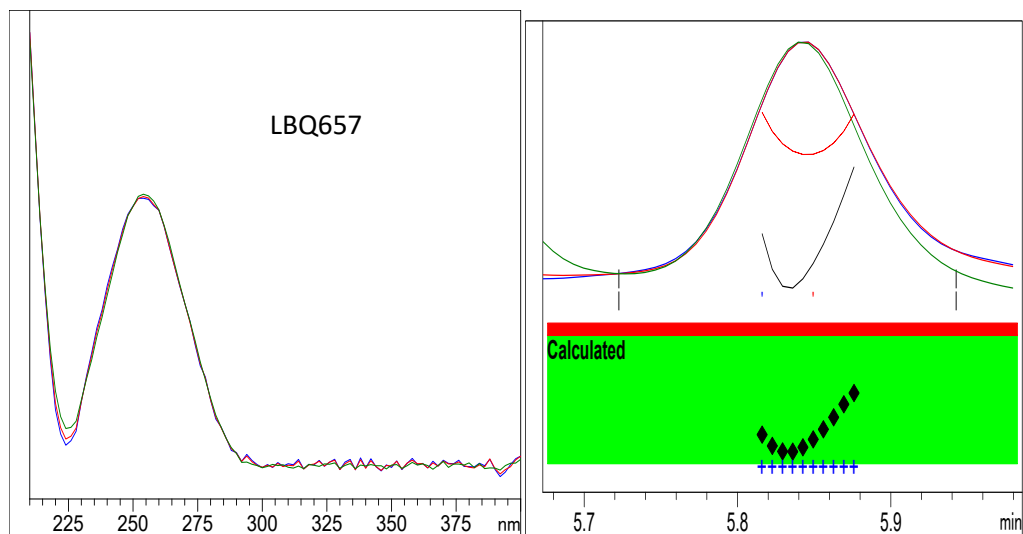

b)

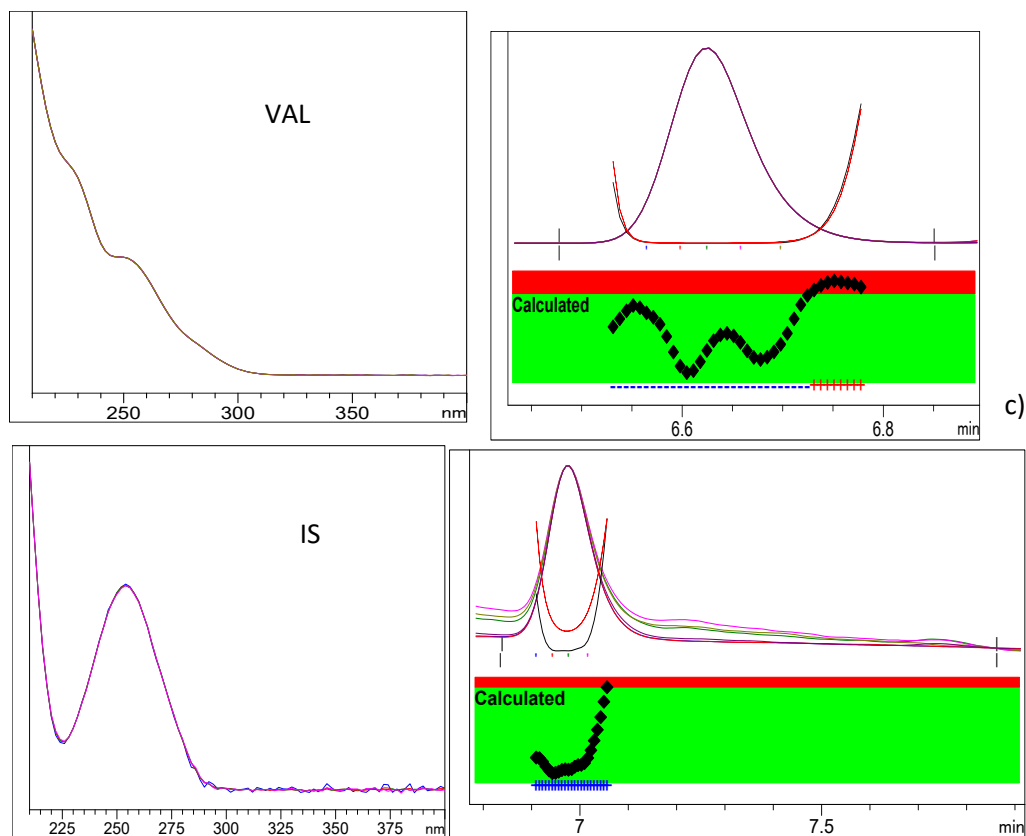

**Figure S4: Representative example of Superimposed absorption spectra and purity profile illustrating peak purity of (a) LBQ657, (b) VAL and (c) IS obtained from real rat plasma at  $T_{max}$  after 15 min oral administration of Entresto™ extracted from DAD.**

**Table S1: Gradient elution ratio and programmed wavelength for HPLC FLD.**

| <b>HPLC/FLD gradient elution ratio</b> |                                  |                     |                               |
|----------------------------------------|----------------------------------|---------------------|-------------------------------|
| <b>Time<br/>(min)</b>                  | <b>%A<br/>(phosphate buffer)</b> | <b>%B<br/>(ACN)</b> | <b>Flow rate<br/>(mL/min)</b> |
| <b>0 → 1</b>                           | 60                               | 40                  | 1                             |
| <b>1.3→8.5</b>                         | 30                               | 70                  | 0.8                           |
| <b>8.6→10</b>                          | 30                               | 70                  | 1.1                           |

  

| <b>HPLC FLD programmed wavelength</b> |                                                |                                                |            |
|---------------------------------------|------------------------------------------------|------------------------------------------------|------------|
| <b>Time<br/>(min)</b>                 | <b><math>\lambda_{\text{ex}}</math><br/>nm</b> | <b><math>\lambda_{\text{em}}</math><br/>nm</b> | <b>PMT</b> |
| <b>0</b>                              | 232                                            | 310                                            | 12         |
| <b>5.5</b>                            | 250                                            | 340                                            |            |
| <b>8.5</b>                            | 232                                            | 310                                            |            |

**Table S2: Intra-day and inter-day precision and accuracy for the determination of LCZ696 analytes, FEX and IBU in spiked rat plasma samples using the proposed HPLC- FLD method.**

| Drug   | Level | Concentration<br>( $\mu\text{g/mL}$ ) | Accuracy                        |                      | Precision                      |                                |
|--------|-------|---------------------------------------|---------------------------------|----------------------|--------------------------------|--------------------------------|
|        |       |                                       | Mean %<br>recovery <sup>a</sup> | $E_r\%$ <sup>b</sup> | Intra-day<br>RSD% <sup>c</sup> | Inter-day<br>RSD% <sup>c</sup> |
| FEX    | LLOQ  | 2                                     | 100.08                          | 0.08                 | 0.96                           | 1.12                           |
|        | LQC   | 5                                     | 103.42                          | 3.42                 | 4.68                           | 2.45                           |
|        | MQC   | 10                                    | 100.51                          | 0.51                 | 7.22                           | 1.67                           |
|        | HQC   | 20                                    | 100.50                          | 0.50                 | 4.92                           | 3.22                           |
| LBQ657 | LLOQ  | 0.02                                  | <b>94.32</b>                    | -5.68                | 4.56                           | 6.21                           |
|        | LQC   | 0.06                                  | 96.89                           | -3.11                | 5.09                           | 3.22                           |
|        | MQC   | 5                                     | 98.71                           | -1.29                | 3.21                           | 2.04                           |
|        | HQC   | 8                                     | 97.01                           | -2.99                | 4.56                           | 3.90                           |
| VAL    | LLOQ  | 0.025                                 | <b>102.85</b>                   | 2.85                 | 6.67                           | 2.33                           |
|        | LQC   | 0.06                                  | 101.63                          | 1.63                 | 5.87                           | 4.13                           |
|        | MQC   | 5                                     | 95.49                           | -4.51                | 3.53                           | 2.01                           |
|        | HQC   | 10                                    | 99.83                           | -0.17                | 2.24                           | 1.34                           |
| SAC    | LLOQ  | 0.02                                  | 101.94                          | 1.94                 | 8.14                           | 4.45                           |
|        | LQC   | 0.06                                  | 99.73                           | -0.27                | 5.23                           | 2.67                           |
|        | MQC   | 5                                     | 95.98                           | -4.01                | 4.22                           | 3.21                           |
|        | HQC   | 8                                     | 98.97                           | -1.03                | 3.73                           | 3.02                           |
| IBU    | LLOQ  | 2                                     | 99.75                           | -0.25                | 5.30                           | 4.12                           |
|        | LQC   | 5                                     | 99.95                           | -0.04                | 3.40                           | 2.10                           |
|        | MQC   | 10                                    | 96.59                           | -3.41                | 0.58                           | 3.90                           |
|        | HQC   | 20                                    | 99.66                           | -0.34                | 2.16                           | 2.66                           |

<sup>a</sup>Mean % recovery for six determinations.

<sup>b</sup>% Relative error.

<sup>c</sup>% Relative standard deviation.

**Table S3: Stability summary of the studied drugs in spiked rat plasma samples at two concentrations levels (LQC and HQC) using the proposed HPLC- FLD method (n = 6)**

| Stability conditions                                        |                   | FEX ( $\mu\text{g mL}^{-1}$ ) |        | LBQ657 ( $\mu\text{g mL}^{-1}$ ) |        | VAL ( $\mu\text{g mL}^{-1}$ ) |        | SAC ( $\mu\text{g mL}^{-1}$ ) |        | IBU ( $\mu\text{g mL}^{-1}$ ) |        |
|-------------------------------------------------------------|-------------------|-------------------------------|--------|----------------------------------|--------|-------------------------------|--------|-------------------------------|--------|-------------------------------|--------|
|                                                             |                   | 5                             | 20     | 0.06                             | 8      | 0.06                          | 10     | 0.06                          | 8      | 5                             | 20     |
| <b>Freeze and Thaw Stability</b><br>After 5 cycles at -20°C | <b>Recovery %</b> | 109.01                        | 107.17 | 103.44                           | 106.03 | 95.04                         | 109.76 | 96.56                         | 108.62 | 104.89                        | 107.95 |
|                                                             | <b>RSD%</b>       | 3.45                          | 1.57   | 2.05                             | 6.09   | 6.01                          | 4.11   | 2.02                          | 4.45   | 3.11                          | 7.84   |
| <b>Post preparative (5°C for 24 h)</b>                      | <b>Recovery %</b> | 106.67                        | 88.44  | 105.55                           | 103.51 | 106.71                        | 97.52  | 106.32                        | 100.28 | 107.01                        | 89.57  |
|                                                             | <b>RSD%</b>       | 5.78                          | 6.57   | 4.32                             | 2.87   | 4.52                          | 2.09   | 3.11                          | 1.27   | 2.02                          | 3.31   |
| <b>Long-Term Stability</b><br>20 days at -20°C              | <b>Recovery %</b> | 105.56                        | 90.72  | 96.34                            | 102.45 | 94.32                         | 100.98 | 105.41                        | 103.79 | 96.31                         | 95.67  |
|                                                             | <b>RSD%</b>       | 3.44                          | 4.99   | 3.78                             | 4.32   | 2.55                          | 5.05   | 2.34                          | 2.09   | 3.22                          | 7.40   |
| <b>Bench-Top Stability(6h)</b>                              | <b>Recovery %</b> | 104.32                        | 94.80  | 95.31                            | 97.34  | 108.03                        | 93.91  | 97.03                         | 98.49  | 95.42                         | 92.30  |
|                                                             | <b>RSD%</b>       | 5.01                          | 4.90   | 4.55                             | 6.39   | 1.33                          | 6.52   | 5.09                          | 5.43   | 4.11                          | 3.97   |
